# Supplementary figures and images for: Dissolution of concentrated surfactant solutions: from microscopy imaging to rheological measurements through numerical simulations
Source: Royal Society of Chemistry journal article supplement (doi:10.1039/c9sm01481k), 2019-01-01

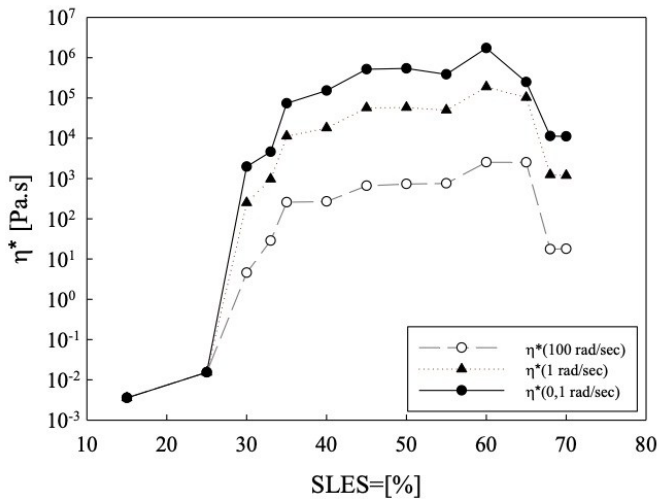

Supplement: c9sm01481k2.pdf [file c9sm01481k2.pdf]

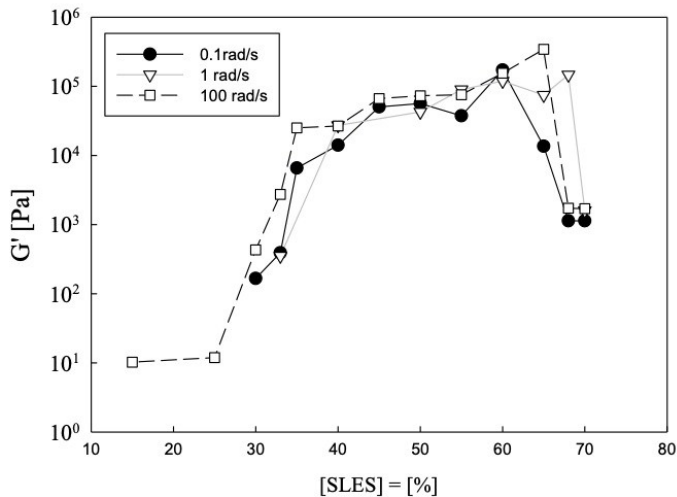

Supplement: c9sm01481k3.pdf [file c9sm01481k3.pdf]
